# Supplementary material
Source: PubMed Central journal article supplement (PMC1459358)

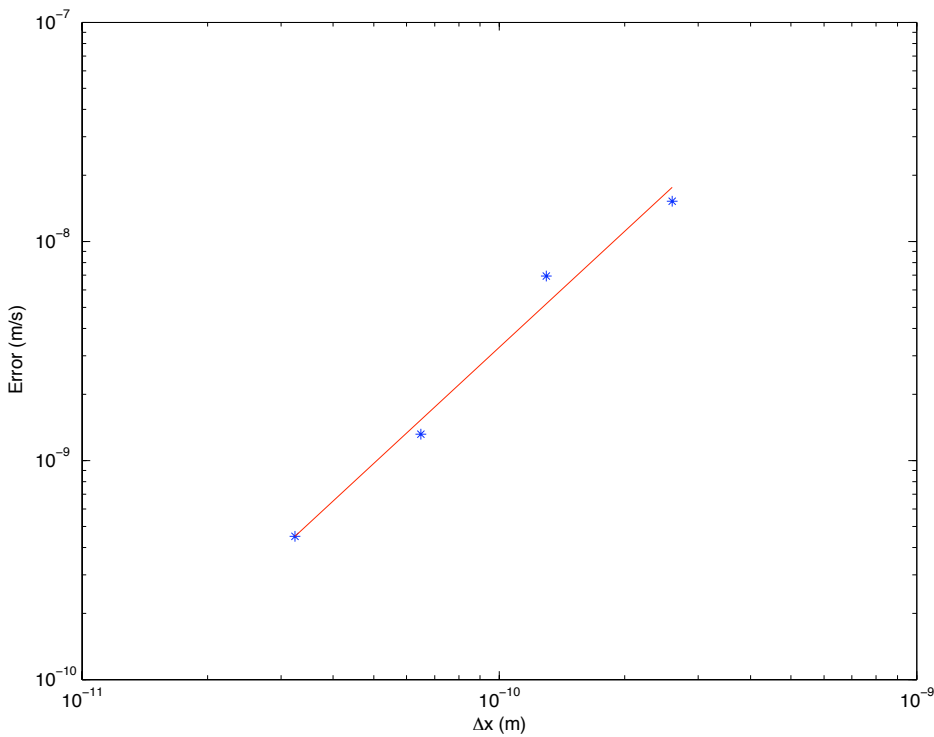

Supplement: pnas_0601215103_1.pdf [file pnas_0601215103_1.pdf]

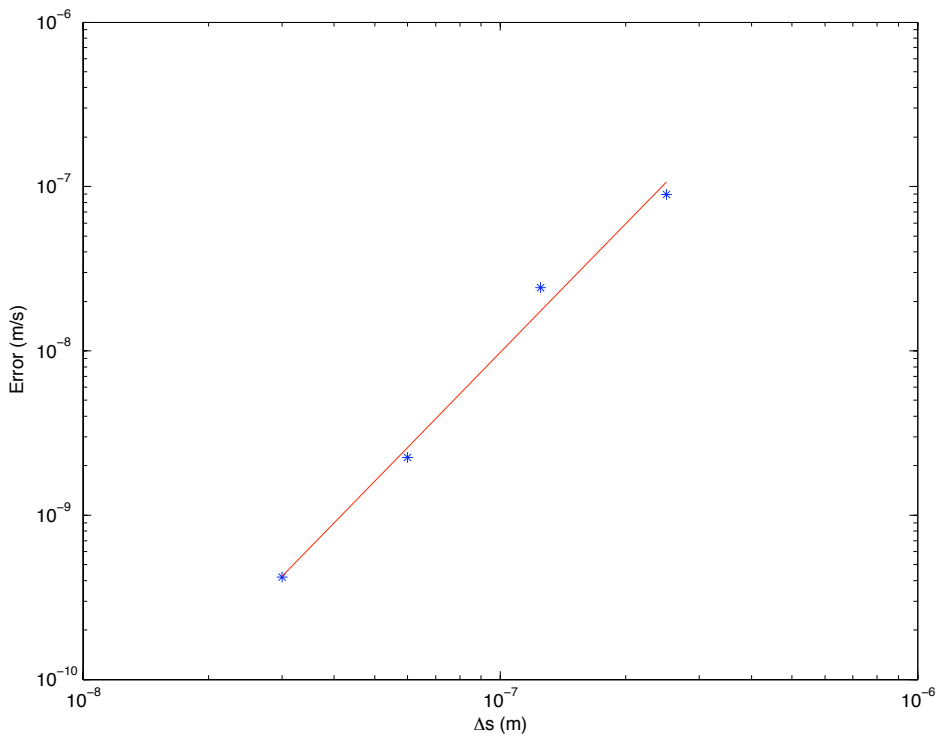

Supplement: pnas_0601215103_2.pdf [file pnas_0601215103_2.pdf]
